# Supplementary material for: Integrating Whole-Genome Sequencing in Clinical Genetics: A Novel Disruptive Structural Rearrangement Identified in the Dystrophin Gene (DMD)
Source: MDPI journal article supplement (doi:10.3390/ijms23010059), 2021-12-22
Supplement: s1 [file s1]

## Supplementary Material II

A

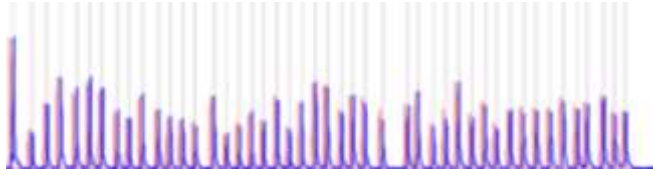

B

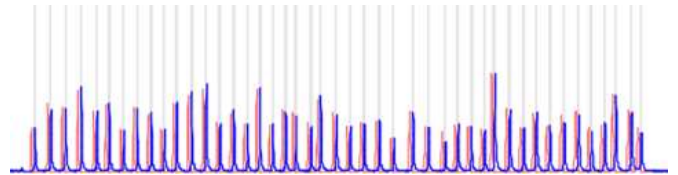

**Patient`s MLPA results (gDNA).** No deletions or duplications were detected in the *DMD* gene using both probes from MRC-Holland (A-P034; B-035). Patient fragments are shown in blue and control fragments in red.

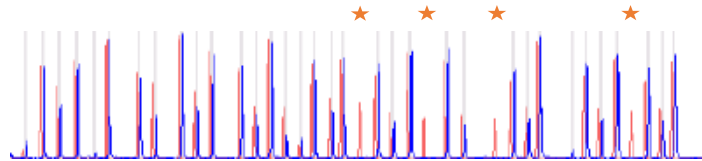

**Patient`s MLPA results (cDNA).** MLPA probe 034 showed absence of signal from probes detecting the sequence corresponding to exons 75, 76, 77 and 79 (orange stars) of *DMD* gene.
