# Supplementary material for: Integrating Whole-Genome Sequencing in Clinical Genetics: A Novel Disruptive Structural Rearrangement Identified in the Dystrophin Gene (DMD)
Source: MDPI journal article supplement (doi:10.3390/ijms23010059), 2021-12-22
Supplement: s1 [file s1]

## Supporting Information files

### a) Original Images of Western Blot - Supplementary Material III

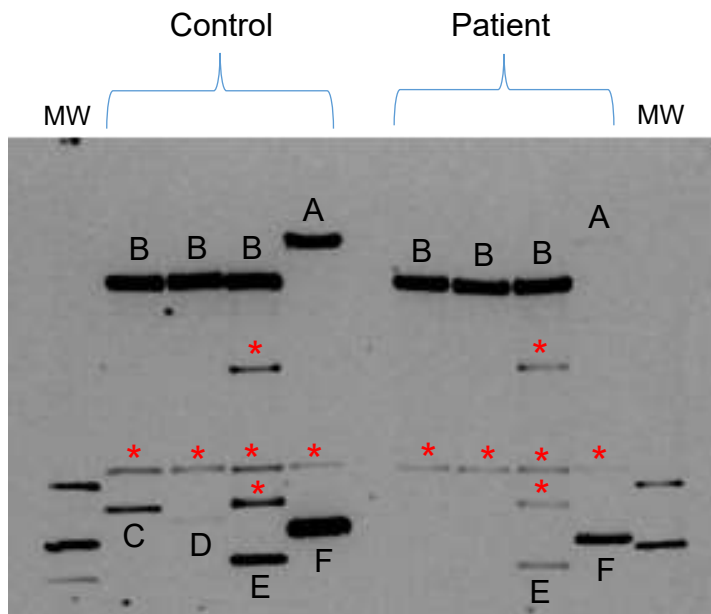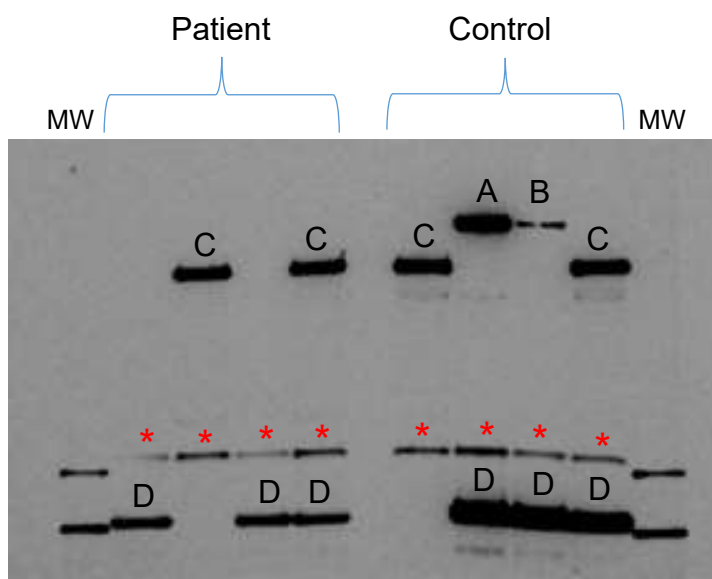

**b) Original Image of gel - Supplementary Material IV**

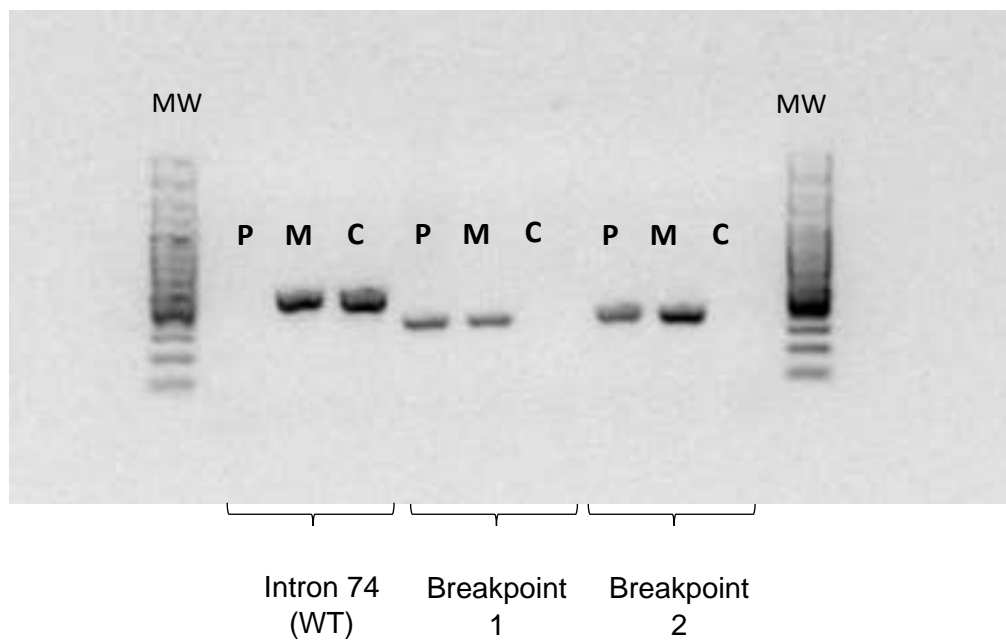

WT – Intron 74 reference sequence

P – Patient

M – Mother

C – Male control DNA

MW – molecular weight marker
