# Supplementary material for: Integrating Whole-Genome Sequencing in Clinical Genetics: A Novel Disruptive Structural Rearrangement Identified in the Dystrophin Gene (DMD)
Source: MDPI journal article supplement (doi:10.3390/ijms23010059), 2021-12-22
Supplement: s1 [file s1]

## Supplementary Material V

```
PRDX4_WT   GAGTTTCTGCCAGCATTAGCCCATTAAGCCATGTCAGAAATATAAAATAGTTGAGGTAGAAGAGA
DMD_WT     CTCCATCACACTGCTCAAATAACTTTCCCATGGAGCCCTGCTAGATCCCTGCAGTTGGAAGAAATCTGTCTT
BrPT-1     GAGTTTCTGCCAGCATTAGCCCATTAAGCCCTGCTAGATCCCTGCAGTTGGAAGAAATCTGTCTT
BrPT-2     CTCCATCACACTGCTCAAATAACTTACATTAGCCCATGTCAGAAATTCTAACATTAGCCCATGTCAGAAATAAAATAGTTG..
```

**Alignment of sequences at inversion junctions.** Microhomology was found between the wild type sequences in the breakpoint regions (boxed). This microhomology is absent in one of the breakpoints (BrPT-1), and part of a duplicated region (underlined) in the other breakpoint (BrPT-2).
