# Supplementary material for: Integrating Whole-Genome Sequencing in Clinical Genetics: A Novel Disruptive Structural Rearrangement Identified in the Dystrophin Gene (DMD)
Source: MDPI journal article supplement (doi:10.3390/ijms23010059), 2021-12-22
Supplement: s1 [file s1]

## Supplementary Material I

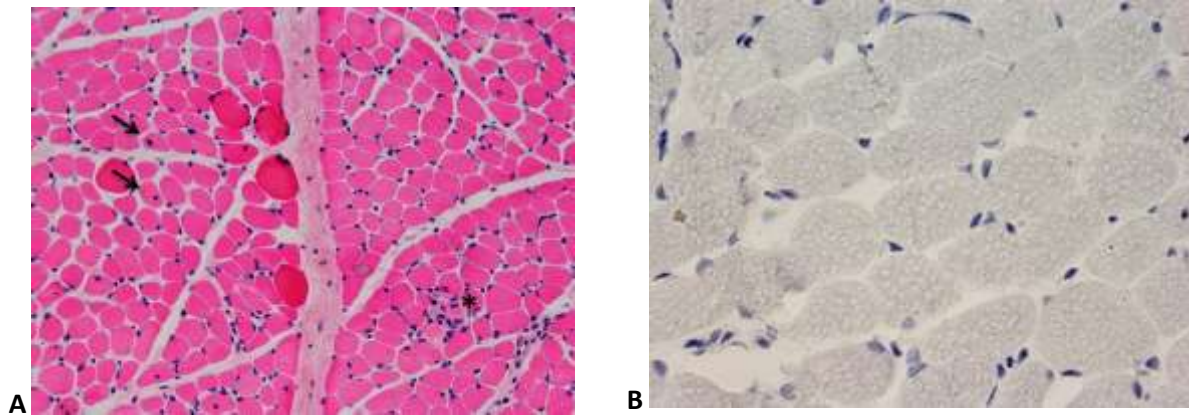

**Patient's muscle biopsy.** A) The histological examination of slides stained with hematoxylin and eosin (H&E, 100x) revealed a slight to moderate change in muscle architecture. It was observed a diffuse variation in the size of muscle fibers, with hypertrophic and atrophic fibers with round and regular contours, and a slight increase in connective tissue. A moderate increase in internal nuclei (arrows) and occasional necrotic fibers were also identified (\*). B) The immunohistochemical study revealed complete loss of expression of the DYS2 fraction of dystrophin (400x).
