# Supplementary material for: Integrating Whole-Genome Sequencing in Clinical Genetics: A Novel Disruptive Structural Rearrangement Identified in the Dystrophin Gene (DMD)
Source: MDPI journal article supplement (doi:10.3390/ijms23010059), 2021-12-22
Supplement: s1 [file s1]

### Supplementary Material III

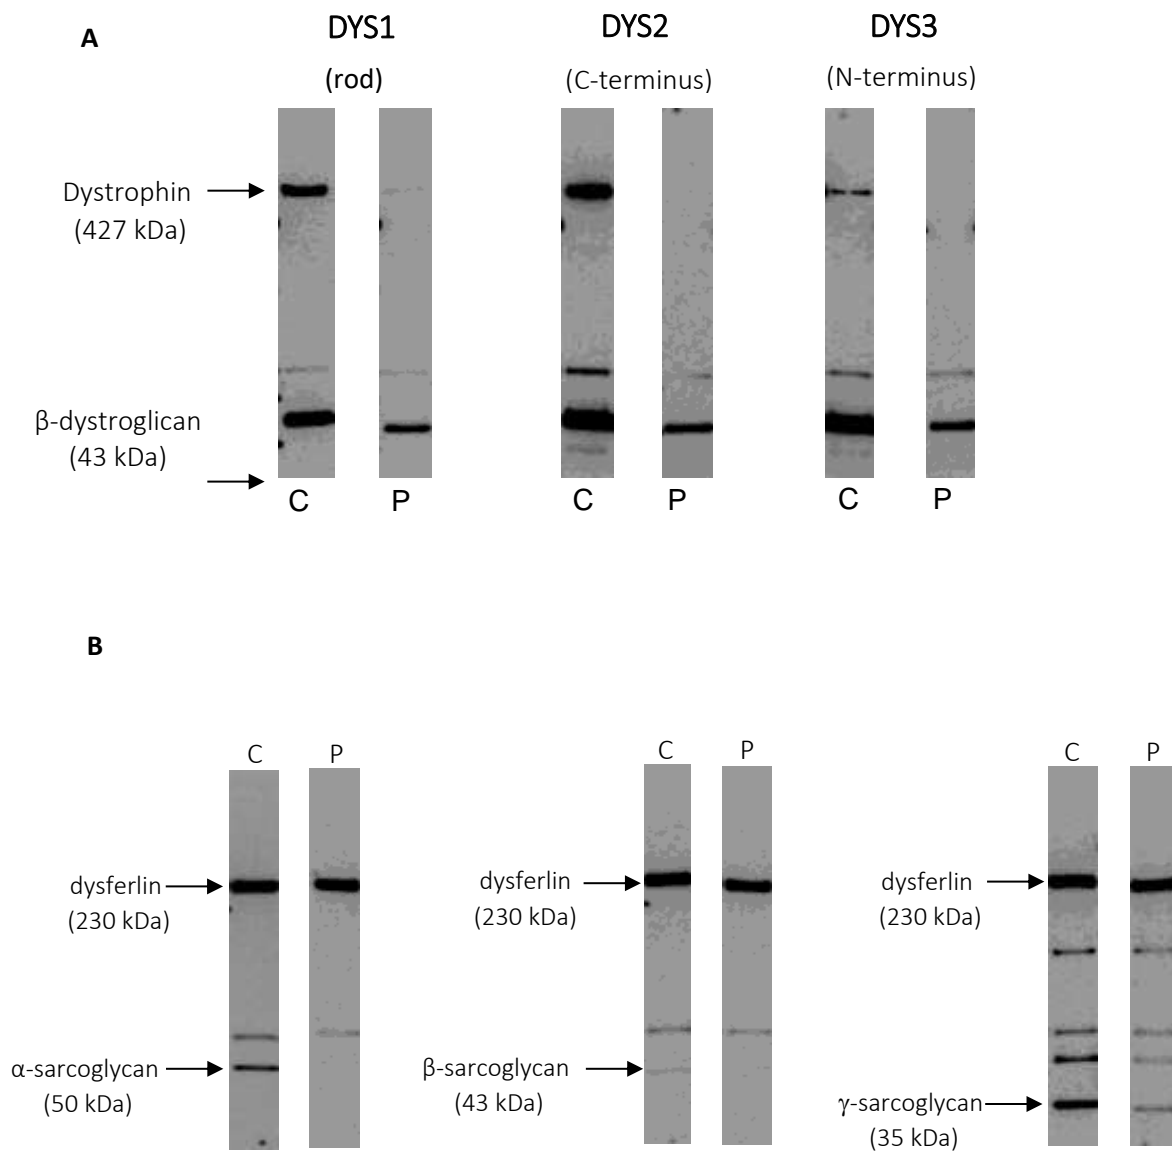

**Western Blot results.** A) Absence of labelling for two of the dystrophin antibodies (DYS2 and DYS3) and reduction for DYS1. B) α-sarcoglycan and β-sarcoglycan also undetectable (C-Control; P-Patient).
