# Supplementary material for: Integrating Whole-Genome Sequencing in Clinical Genetics: A Novel Disruptive Structural Rearrangement Identified in the Dystrophin Gene (DMD)
Source: MDPI journal article supplement (doi:10.3390/ijms23010059), 2021-12-22
Supplement: s1 [file s1]

## Supplementary Material IV

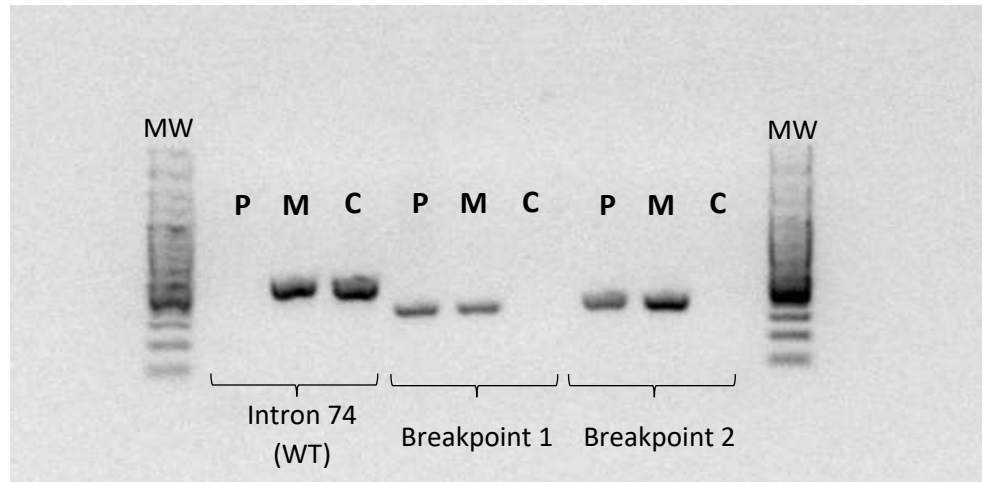

**Family segregation studies.** PCR amplification of intron 74 reference sequence (WT) and both inversion breakpoints in patient (P), his mother (M) and a male control DNA (C), shows the presence of the inversion in the mother in a heterozygous state (MW- molecular weight marker).
